# Supplementary material for: Superconductivity in two-dimensional phosphorus carbide (β0-PC)
Source: Royal Society of Chemistry journal article supplement (doi:10.1039/c8cp00697k), 2018-01-01
Supplement: c8cp00697k1.pdf [file c8cp00697k1.pdf]

## Electronic Supplementary Information

### **Superconductivity in two-dimensional phosphorus carbide**

#### **( $\beta_0$ -PC)**

Bao-Tian Wang,<sup>\*a,b</sup> Peng-Fei Liu,<sup>\*a,b</sup> Tao Bo,<sup>a,b</sup> Wen Yin,<sup>a,b</sup> Olle Eriksson,<sup>d</sup> Jijun Zhao,<sup>e</sup> and Fangwei Wang<sup>b,c</sup>

*<sup>a</sup>Institute of High Energy Physics, Chinese Academy of Sciences (CAS), Beijing 100049, China.*

*<sup>b</sup>Dongguan Institute of Neutron Science (DINS), Dongguan 523803, China.*

*<sup>c</sup>Beijing National Laboratory for Condensed Matter Physics, Institute of Physics, Chinese Academy of Sciences (CAS), Beijing 100080, China.*

*<sup>d</sup>Department of Physics and Astronomy, Division of Materials Theory, Uppsala University, Box 516, SE-75120 Uppsala, Sweden.*

*<sup>e</sup>Key Laboratory of Materials Modification by Laser, Ion and Electron Beams (Dalian University of Technology), Ministry of Education, Dalian 116024, China.*

---

\* Corresponding author. Tel.: +86-769-89156482. E-mail: [wangbt@ihep.ac.cn](mailto:wangbt@ihep.ac.cn)

\* Corresponding author. Tel.: +86-769-89156482. E-mail: [pfliu@ihep.ac.cn](mailto:pfliu@ihep.ac.cn)

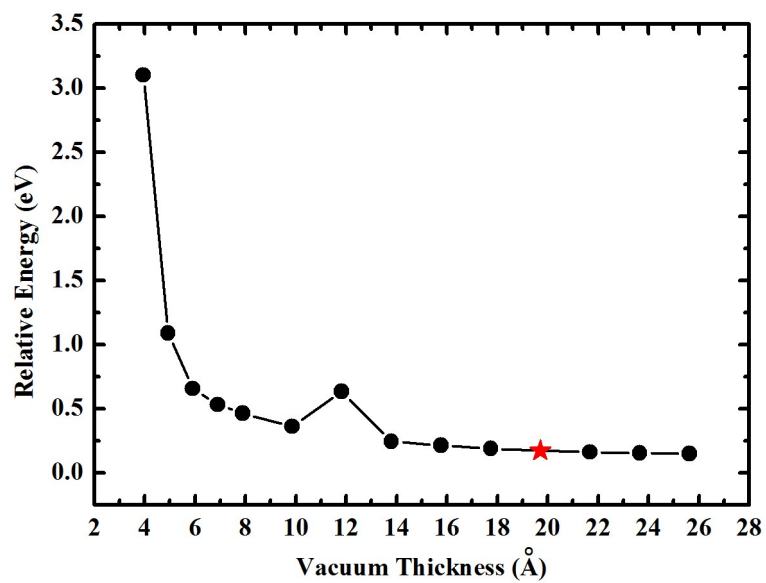

**Figure S1.** The relative energy of the electron-doping (0.1 e/cell)  $\beta_0$ -PC vs. the vacuum thickness. The red star stands for the vacuum thickness used in our calculations of the superconductivity and other related properties.
